# Supplementary material for: Transcriptome profiling of whitefly guts in response to Tomato yellow leaf curl virus infection
Source: Virol J. 2018 Jan 16;15:14. doi: 10.1186/s12985-018-0926-6 (PMC5771010; doi:10.1186/s12985-018-0926-6)
Supplement: Supplementary file 2 — Sequences of primers used in the study. Displayed are the sequence of the primers used for qRT-PCR. Primers were synthesized by GenScript (Nanjing, China). (XLSX 9 kb) [file 12985_2018_926_MOESM2_ESM.xlsx]

## Sheet: Sheet1
Gene name	Gene ID	Forward primer(5'-3')	Reverse primer(5'-3')
Knottin1	c24521_g1	CGTGGTGCAGCAATTTCCCA	TCGCCGTTGCTACTCTCTGG
Knottin2	c29023_g1	GAGTTGCGTGGAGTCCTGGT	CGCCCAATCGAATTGCCTCT
Knottin3	c25386_g1	TTTGGTCAGACACGCGGAGA	CTCCCGTTCCTCGCTGACTT
Knottin4	c27948_g1	TGCTGAGGACGGCAGTAAGG	AAGCCCGACTGGGAATACGG
Defensin	c29424_g2	GAACGCGGCCCAAGGAGAT	GCTCCCACAATGGCCTCCT
Scavenger receptor	c26558_g1	TCCCGCCACACATGACTCAA	GGGTCCAGATGGACAGAAGCA
Regucalcin	c33203_g1	CGGACAAGTGTCGCAGCATC	GGTTGCACATCCTGCACCTG
Ankyrin	c26445_g2	TGGTTGTATGCTATTTCCGC	GCAGAAGTGGTGGAGGATAAC
E3 ubiquitin ligase	c27270_g1	CGCCGTCTTGTTCACTTCGG	ACTTCTCACCAACGCCCAGA
DRV	c36053_g3	GTCGGCCTTCTGGATCTGCT	CAACAGCCTCCTCGTCGTCA
